# Supplementary material for: Contemporary biodiversity pattern is affected by climate change at multiple temporal scales in steppe on the Mongolian Plateau
Source: Copernicus journal article supplement (doi:10.5194/bg-2022-173), 2022-09-26
Supplement: Supplementary file 1 [file Supporting Information_Supplementary Figures.docx]

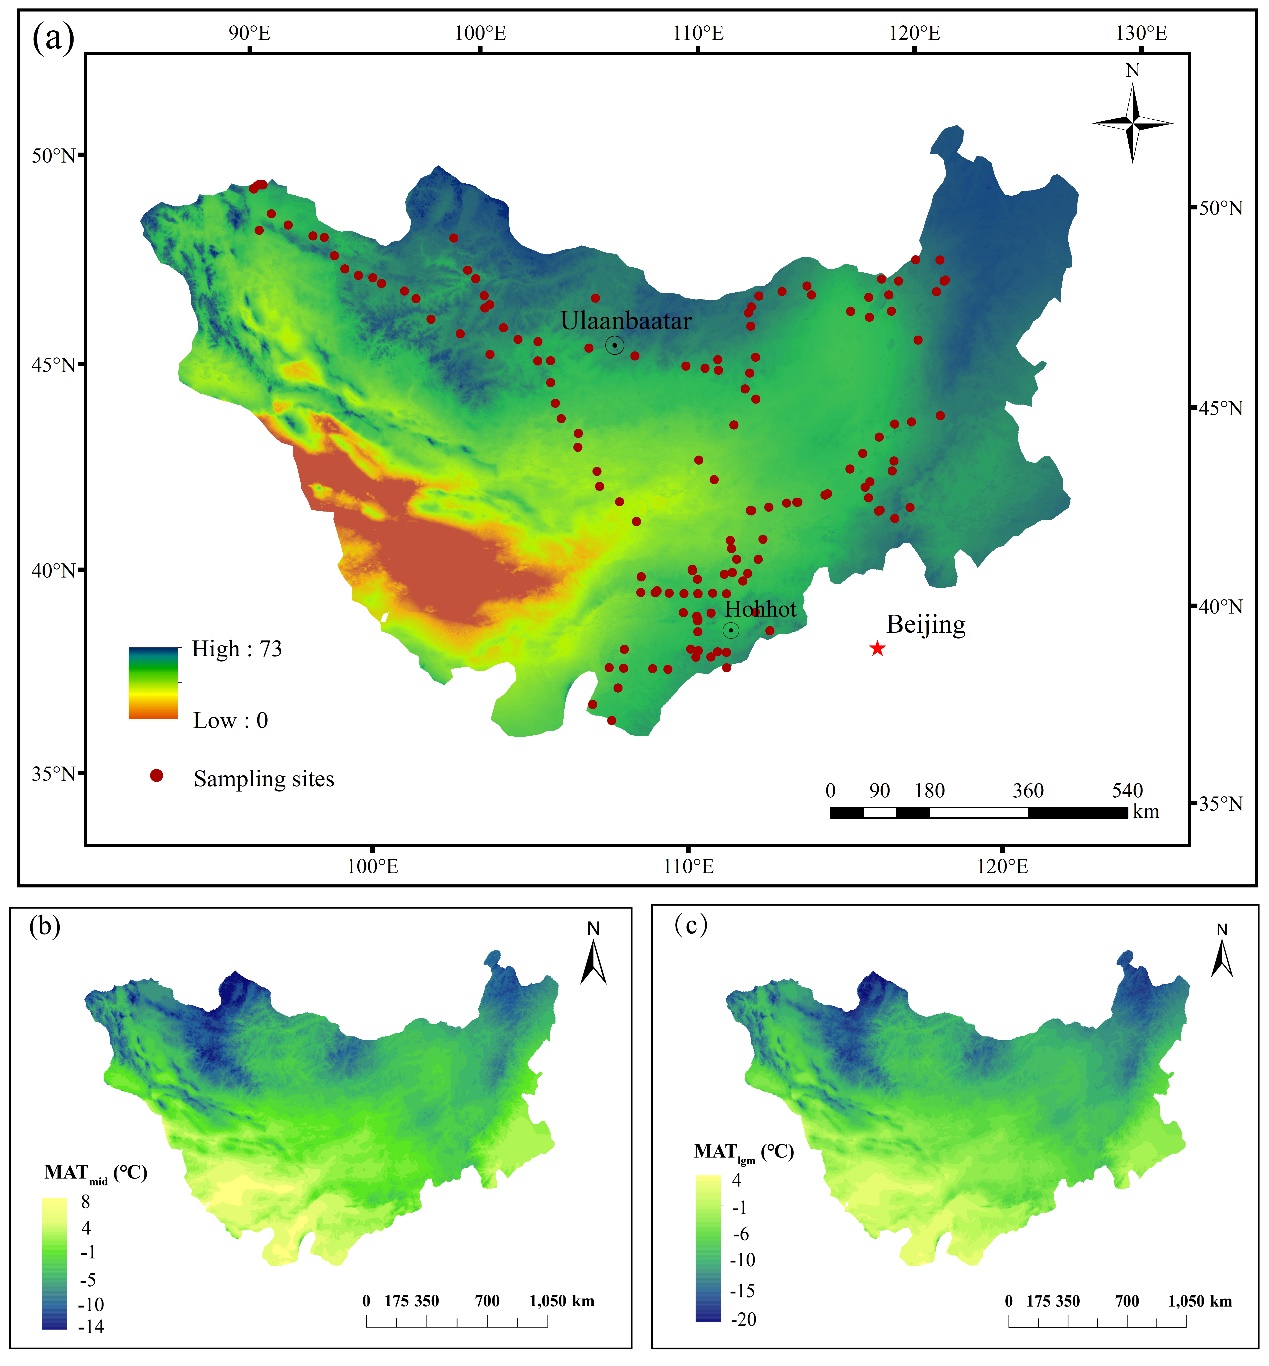


**Fig. S1 Study area and field sampling sites.** (a) Aridity index of current climate; (b) Mean annual temperature of the Mid-Holocene; (c) Mean annual temperature of the Last Glacial Maximum.


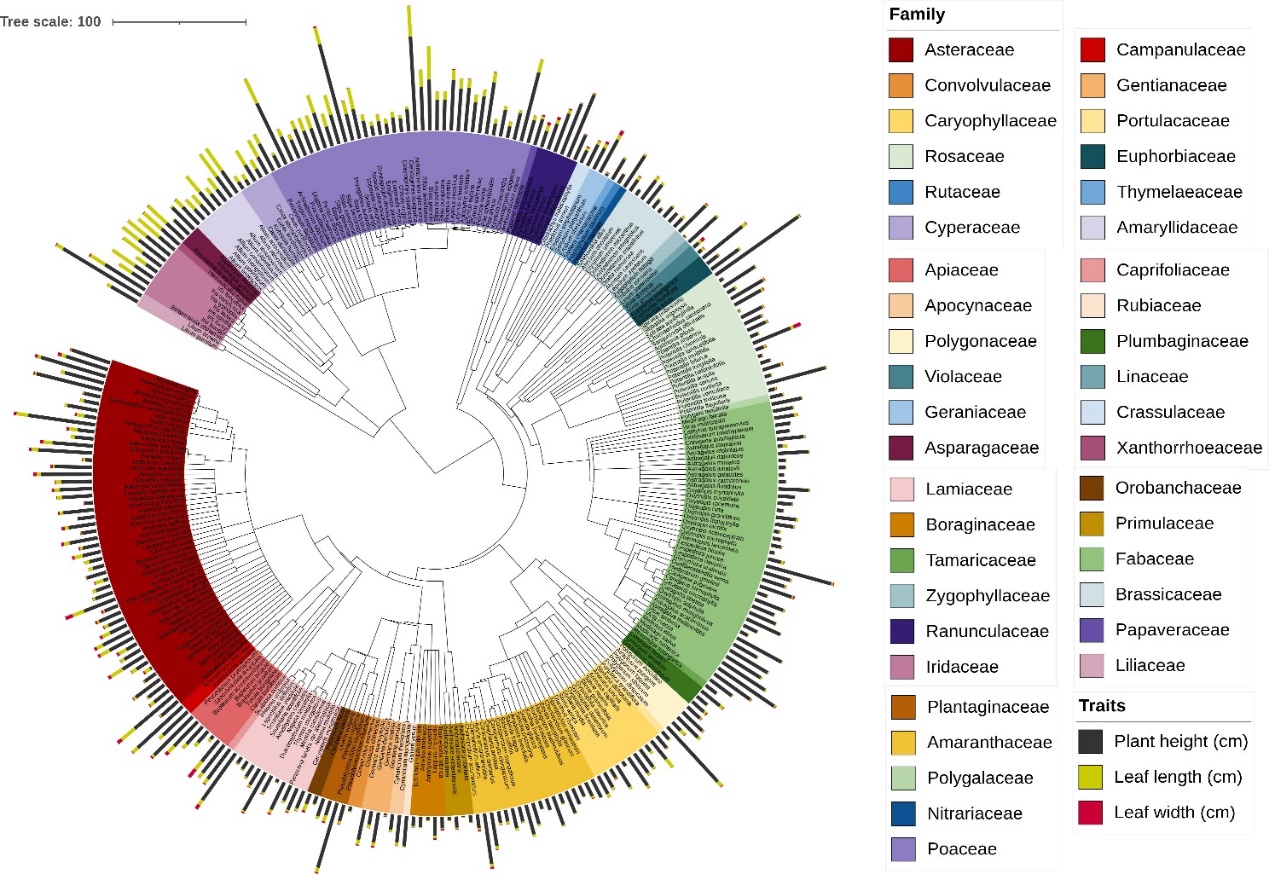


**Fig. S2 Phylogenetic trees of herbaceous plants and their traits in steppe on the Mongolian Plateau**


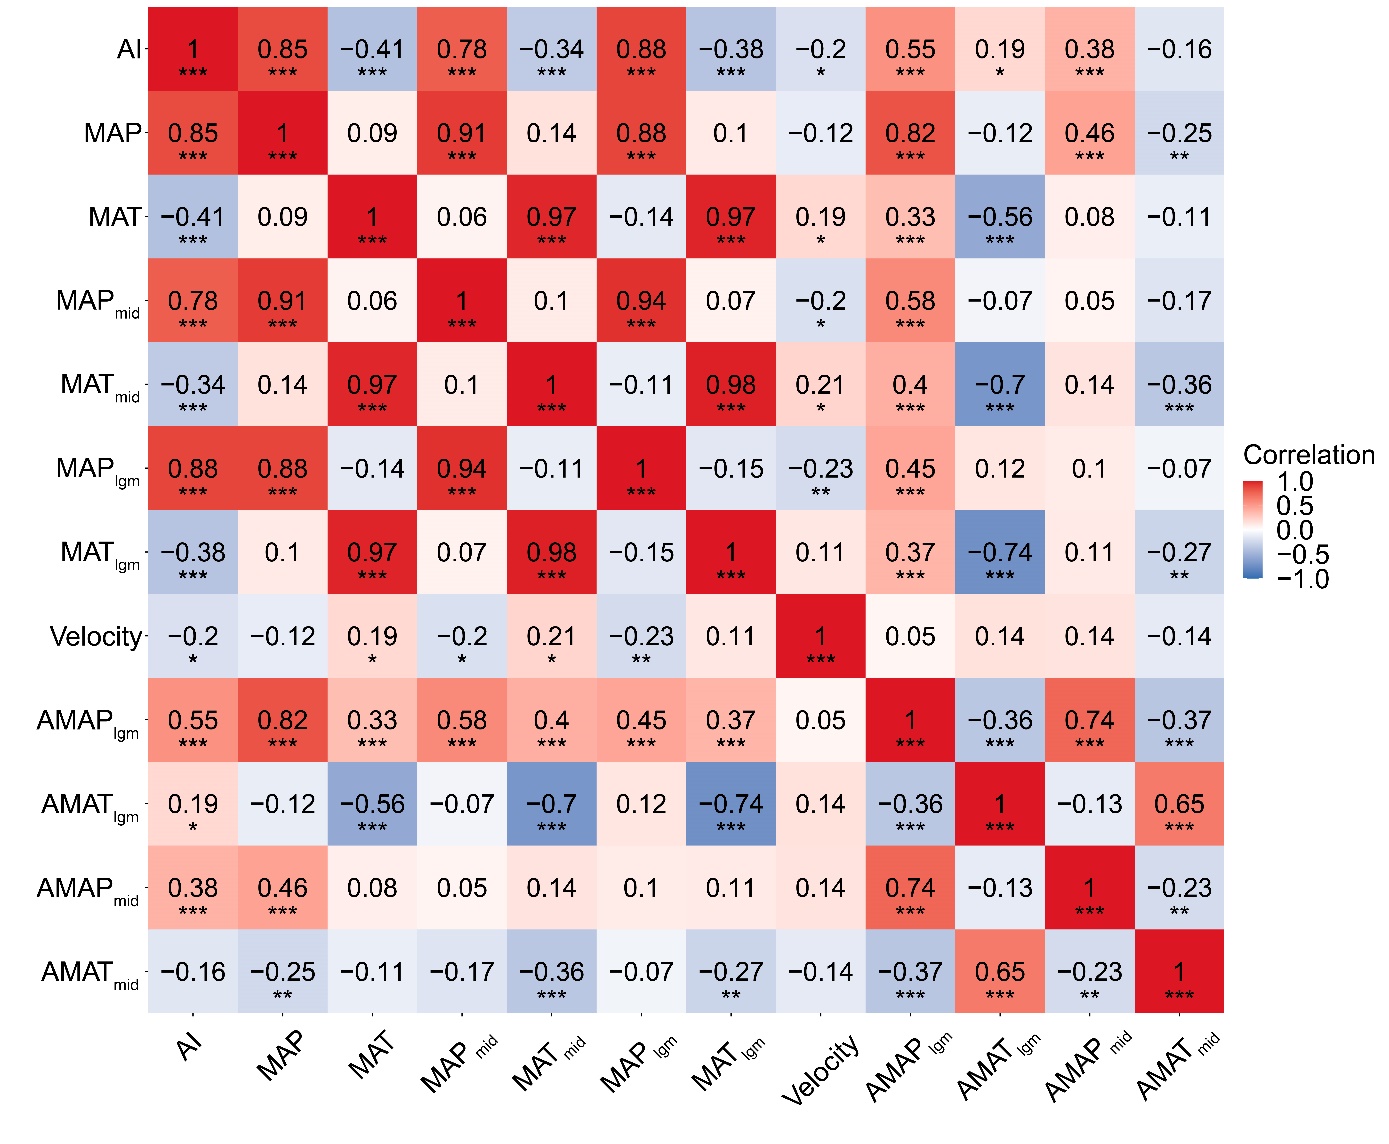


**Fig. S3 Correlation analysis of climate factors**
