# Supplementary material for: Contemporary biodiversity pattern is affected by climate change at multiple temporal scales in steppe on the Mongolian Plateau
Source: Copernicus journal article supplement (doi:10.5194/bg-2022-173), 2022-09-26
Supplement: Supplementary file [file bg-2022-173-RC2-supplement.pdf]

1 **Title:** Contemporary biodiversity pattern is affected by climate change at multiple temporal scales in  
2 steppe on the Mongolian Plateau

3 **Running Title:** Climate change and plant biodiversity

4 **List of Authors:**

5 Zijing Li<sup>1,2</sup>, Zhiyong Li<sup>3,\*</sup>, Xuze Tong<sup>4</sup>, Lei Dong<sup>1,2</sup>, Ying Zheng<sup>1,2</sup>, Jinghui Zhang<sup>3</sup>, Bailing Miao<sup>5</sup>,  
6 Lixin Wang<sup>3</sup>, Liqing Zhao<sup>3</sup>, Lu Wen<sup>3</sup>, Guodong Han<sup>6</sup>, Frank Yonghong Li<sup>3</sup>, Cunzhu Liang<sup>3</sup>

7 **Institutional affiliations:**

8 <sup>1</sup>Yinshanbeilu Grassland Eco-hydrology National Observation and Research Station, China Institute  
9 of Water Resources and Hydropower Research, Beijing 100038, China

10 <sup>2</sup>Institute of Water Resources for pastoral Area Ministry of Water Resources, Hohhot 010020, Inner  
11 Mongolia

12 <sup>3</sup>Key Laboratory of Ecology and Resource Use of the Mongolian Plateau, Ministry of Education of  
13 China; Collaborative Innovation Center for Grassland Ecological Security, Ministry of Education of  
14 China; School of Ecology and Environment, Inner Mongolia University, Hohhot 010021, P. R. China

15 <sup>4</sup> Institute of Agricultural Resources and Regional Planning, Chinese Academy of Agricultural  
16 Sciences, Beijing 100081, P. R. China

17 <sup>5</sup> Inner Mongolia Meteorological Institute, Hohhot 010051, P. R. China

18 <sup>6</sup>Key Laboratory of Grassland Resources of the Ministry of Education, Key Laboratory of Forage  
19 Cultivation, Processing and High Efficient Utilization of the Ministry of Agriculture and Rural  
20 Affairs, Inner Mongolia Key Laboratory of Grassland Management and Utilization, College of  
21 Grassland, Resources and Environment, Inner Mongolia Agricultural University, Hohhot 010011, P.  
22 R. China

23 **Contact Information:** \*Corresponding author. E-mail: zylee007@imu.edu.cn; tel: +86 136 7475  
24 7329.

25

## 26 **Abstract**

27 Present and historical climate conditions jointly determine contemporary biodiversity patterns and  
28 ecosystem functions. However, it remains unclear how contemporary climate and paleoclimate  
29 changes together affect the three dimensions of biodiversity (i.e., taxonomic diversity, functional  
30 diversity and phylogenetic diversity) and their relationship with ecosystem functions. Here, we  
31 assess the impact of current climate, paleoclimate and its anomalies on contemporary biodiversity  
32 and ecosystem functions. We estimated the taxonomic ~~diversity~~, functional ~~diversity~~ and  
33 phylogenetic diversity of grassland on the Mongolian Plateau using vegetation survey data and trait  
34 information. We then used Random Forest ~~models~~ and Structural Equation models to assess the  
35 relative importance of the present ~~climate~~, the Mid Holocene ~~climate~~, the Last-Glacial Maximum  
36 climate ~~and~~ paleoclimate changes as determinants of diversity and aboveground biomass. Our results  
37 showed that paleoclimate changes and modern climate jointly determined contemporary biodiversity  
38 patterns, while community biomass was mainly affected by modern climate, namely the aridity  
39 index. Modern aridity and temperature were two major influences on all three dimensions of  
40 biodiversity. Mid-Holocene climate anomalies had a strong effect on species richness and  
41 phylogenetic diversity, while functional diversity was mainly affected by temperature anomalies  
42 since the Last Glacial Maximum. These findings suggest that contemporary biodiversity patterns  
43 may be affected by processes at divergent temporal scales. Our results show that simultaneously  
44 exploring the response of the three dimensions of biodiversity in different periods of climate change

45 and the theoretical framework for its impact on community biomass is helpful to provide a more  
46 comprehensive understanding of patterns of biodiversity and its relationship with ecosystem  
47 functions.

#### 48 **Keywords**

49 Aridity index, biodiversity and ecosystem functions, functional diversity, paleoclimate anomaly,  
50 phylogenetic diversity, taxonomic diversity

#### 51 **1. Introduction**

52 Global climate changes, such as increasing temperature and changing precipitation, are altering  
53 biodiversity patterns at an unprecedented rate, and have serious consequences for ecosystem  
54 functions related to biodiversity changes (Mottl et al., 2021; Nolan et al., 2018; Ye et al., 2019).  
55 Ecosystem functioning associated with biodiversity, and contemporary diversity patterns and their  
56 relationships may be regulated by modern climate, past climate and climate change (Fordham et al.,  
57 2020; Eiserhardt et al., 2015; Svenning et al., 2015).

58 Ecosystem ~~function~~ are strongly influenced by biodiversity (Isbell et al., 2011; Hooper et al.,  
59 2005), but understanding the effects of different dimensions of biodiversity (i.e., taxonomic diversity,  
60 functional diversity and phylogenetic diversity) on ecosystem functions (BEF) is still a challenge in  
61 ecology (Van Der Plas, 2019; Cadotte et al., 2008; Swenson, 2011). Traditionally, most studies of  
62 BEF have predominantly focused on the relationship between taxonomic diversity (i.e., species  
63 richness) and biomass or productivity. However, only considering taxonomic diversity has the  
64 limitation that it may ~~ignore~~ the important ecological processes such as the formation of function  
65 traits or the evolutionary history of species (Flynn et al., 2011; Swenson, 2011). The importance of  
66 taking into account other aspects of biodiversity, including functional diversity and phylogenetic

67 diversity, has increasingly been recognized. The effects of plant functional diversity on ecosystem  
68 functioning are largely driven by variations in plant functional traits, such as adult plant height and  
69 leaf size (Diaz et al., 2016). Phylogenetic diversity (PD) is a key driver of community assembly and  
70 ecosystem functions (Srivastava et al., 2012; Cavender-Bares et al., 2009). Previous research had  
71 shown that PD may be a better metric than species richness or functional diversity for predicting  
72 plant biomass (Cadotte et al., 2008). Communities with higher PD have stronger anti-interference  
73 ability because of their evolutionary potential to adapt to changing environmental conditions.  
74 However, the role of multi-dimensional biodiversity in driving ecosystem functions in response to  
75 climate change still needs further research. Elucidating the impacts of multi-dimensional biodiversity  
76 on biomass in the changing world can deepen our understanding of the direct and indirect effects of  
77 changes in climate and biodiversity on terrestrial ecosystems, and improve predictions of the  
78 ecological consequences of global climate changes.

79 Changes in community biodiversity and composition caused by climate change have been  
80 explored in various ecosystems (Avolio et al., 2021), including tropical forests in the Amazon,  
81 alpine meadows on the Qinghai-Tibet Plateau (Liu et al., 2018) and a heterogeneous California  
82 (Esquivel-Muelbert et al., 2019) grassland (Harrison et al., 2015). Dispersal limitation and  
83 environmental filtering (i.e., climatic conditions and paleoclimate change) plays an important role in  
84 sorting species from the global species pool and in shaping large-scale diversity patterns (Kubota et  
85 al., 2018; Liu et al., 2021). Many studies have found that climate changes in the Mid-Holocene and  
86 the Quaternary interglacial period are the main driving factors of current species distribution,  
87 functional traits and community phylogeny (Svenning and Skov, 2007b). The current patterns of  
88 species richness and distribution of European flora are jointly affected by contemporary climatic

89 conditions and climate change during the Late Quaternary glacial-interglacial period (Svenning and  
90 Skov, 2007a; Svenning and Skov, 2007b). Contemporary plant functional traits and composition are  
91 highly sensitive to climate and influenced by climate from tens of thousands of years ago, with  
92 important consequences for ecosystem functions (Blonder et al., 2018; Butler et al., 2017). For  
93 example, in Europe patterns of plant functional diversity exhibited prominent glacial-interglacial  
94 climate change imprints (Ordonez and Svenning, 2015; Ordonez and Svenning, 2017). This is partly  
95 due to the non-random removal of functional combinations that may have occurred during the Last-  
96 Glacial Maximum (LGM; ~21,000 years ago), increasing functional differences between native and  
97 migratory species, leading to smaller and dispersed functional spaces (Ordonez and Svenning, 2017).  
98 Evidence derived from the fossil pollen sequence and ecological datasets has shown that the  
99 acceleration of biodiversity changes began millennia ago, whereas vegetation changes during the  
100 Late Pleistocene to Early Holocene were driven primarily by changing climates (Mottl et al., 2021).  
101 In the South American tropics, the species composition and structure of Last Glacial Maximum  
102 forests were quite different from those of today, and biomass was also lower than that of  
103 contemporary forests (Mayle et al., 2009).

104 Furthermore, the effects of climate change on biodiversity should depend partly on climate  
105 displacement rate (climate-change velocity) (Sandel et al., 2011). For example, phylogenetic  
106 clustering increased with increasing intensity of Quaternary glacial-interglacial climatic oscillations  
107 in South America and Africa (Kissling et al., 2012). There is evidence that vegetation changes in  
108 Northern Europe were non-linear and varied greatly among regions in the early-mid Holocene  
109 (Seddon et al., 2014). Paleoclimate simulations since 21,000 years B.P. suggest that there are great  
110 similarities between past and future temperature changes in Eurasian temperate grasslands (Fordham

111 et al., 2020). During the last glacial-interglacial transition period, global warming and related climate  
112 change led to changes in ecosystems to a degree comparable to the predicted warming under future  
113 high-emission scenarios (Nolan et al., 2018). Therefore, studying the impact of past climate and its  
114 changes on contemporary biodiversity patterns will help us understand the potential effects of future  
115 climate changes. However, most studies exploring the impact of present climate and paleoclimate  
116 drivers on ecosystem functions have focused on forest ecosystems, while grassland ecosystems  
117 remain understudied. In addition, it is not yet clear whether taxonomy, function and phylogenetic  
118 diversity will vary with climate gradients and climate changes, and the intensity of any such changes  
119 remain unclear. Therefore, there is an urgent need to consider the impact of current climate,  
120 paleoclimate and its anomalies on contemporary biodiversity and ecosystem functions.

121 The Mongolian Plateau is located in the arid and semi-arid area of eastern Eurasia. During the  
122 Late Quaternary, the Mongolian Plateau experienced severe alternating dry and wet climatic  
123 fluctuations (Maestre et al., 2021; Tian et al., 2017), which may have a significant impact on current  
124 plant diversity and ecosystem function. However, the impacts of climate in different periods and  
125 climate legacy effects on aboveground biomass of steppes in the Mongolian Plateau, as well as  
126 whether these effects are biodiversity dependent, remain to be evaluated. To address these knowledge  
127 gaps, we coupled data from a field survey of 152 sites in the Mongolian Plateau (Fig. S1) to existing  
128 databases on present and past climates to explore present climate and the legacy effects of climate  
129 during the Last Glacial Maximum and the Mid-Holocene on current biodiversity and biomass.

130 Here, we aim to evaluate the relative importance of taxonomic, functional, and phylogenetic  
131 diversity on community biomass of steppe in the Mongolian Plateau, and to assess whether and how  
132 climate in different periods and their changes affect the three dimensions of diversity, and their

133 relationships with community biomass. We specifically ask: (1) Do the three dimensions of diversity  
134 affect community biomass, and if so, to what extent? (2) Whether and how climate at divergent  
135 temporal scales and paleoclimatic changes affect different dimensions of biodiversity? And (3) If  
136 there are effects, how do they affect the biodiversity-biomass relationship?

## 137 **2. Materials and Methods**

### 138 **2.1 Study Area**

139 We conducted field surveys in the grasslands of the Mongolian Plateau, including Inner Mongolia  
140 Autonomous Region in China and Mongolia, during June to August of 2014~2018 (Fig. S1). The  
141 Mongolian Plateau is located in the eastern part of Eurasia, with a geographic range of 37.61° to  
142 53.35° N, 87.83° to 125.95° E, and an elevation range from 85 m to 4203 m a.s.l. (above sea level).  
143 The mean annual temperature (MAT) of the study region ranges from -12 °C to 10 °C and mean  
144 annual precipitation (MAP) ranges from 26 mm to 641 mm.

### 145 **2.2 Data Collection**

#### 146 **2.2.1 Sites Sampled and Vegetation Investigation**

147 We investigated 152 grassland sites set in flat areas **with limited human interference** and a relatively  
148 homogeneous environment. These sites were separated by about 50 km. **One or three** 10 m × 10 m  
149 quadrats were set in each site. Within each quadrat, five 1 m × 1 m plots were placed at each corner  
150 and at the center of the quadrat (**only three** 1 m × 1 m plots along the diagonal line of the quadrat in a  
151 few sites) to investigate vegetation. A total of 899 plots were investigated and 296 vascular plant  
152 species were recorded.

153 We measured species height, density, coverage and standing biomass of each species in each  
154 plot. All plant species were cut at ground level and ~~were~~ separately bagged, then oven-dried at 65 °C

155 to constant weight, and weighed for dry matter.

### 156 **2.2.2 Climate Data**

157 Mean annual temperature (MAT, °C) and ~~the~~ mean annual precipitation (MAP, mm) were obtained  
158 from the CHELSA database (Climatologies at High Resolution for the Earth's Land Surface Areas,  
159 <http://chelsa-climate.org/>) (Karger et al., 2017). Potential ~~evapo-transpiration~~ (PET) was obtained  
160 from the CGIAR-CSI (CGIAR Consortium for Spatial Information, <http://www.cgiar-csi.org>) based  
161 on latitude and longitude data for each site (Trabucco and Zomer, 2019). The resolution of both is 30  
162 arc seconds. Aridity was measured using the aridity index (AI,  $AI = MAP / PET$ ). Higher AI values  
163 indicate lower aridity and higher humidity. Paleoclimate data were downloaded from Worldclim  
164 (<http://worldclim.com/paleo-climate1>) with a resolution of 2.5 minutes. The database was made  
165 available by CMIP5 (Coupled Model Intercomparison Project Phase 5) and was calibrated based on  
166 the current climate using WorldClim 1.4. The MAT and MAP of the Mid-Holocene (MID, about  
167 6000 years ago) and the Last Glacial Maximum (LGM, about 22,000 years ago) were simulated  
168 based on CCMS4 (Community Climate System Model version 4). Climate anomaly (i.e., **present-day**  
169 values minus paleoclimate values) **was used to indicate the degree of climate variability since** the  
170 MID and the LGM (Sandel et al., 2011). Temperature-change velocity from the LGM to the present  
171 (velocity, m/yr) was obtained from DRYAD (<https://datadryad.org>) (Sandel et al., 2011). The climate  
172 variables used in this study are shown in Table 1.

173

174

175

176



**Table 1 Climate variables included in this study**

|                     | Climate variables                                        | Abbreviation        |
|---------------------|----------------------------------------------------------|---------------------|
|                     | Mean annual precipitation of the <b>present</b>          | MAP                 |
| The present climate | Mean annual temperature of the present                   | MAT                 |
|                     | Aridity index of the present                             | AI                  |
| The Mid-Holocene    | Mean annual precipitation of the Mid-Holocene            | MAP <sub>mid</sub>  |
| climate             | Mean annual temperature of the Mid-Holocene              | MAT <sub>mid</sub>  |
| The Last Glacial    | Mean annual precipitation of the Last Glacial Maximum    | MAP <sub>lgm</sub>  |
| Maximum climate     | Mean annual temperature of the Last Glacial Maximum      | MAT <sub>lgm</sub>  |
|                     | MAP anomaly from the Mid-Holocene to the present         | AMAP <sub>mid</sub> |
|                     | MAT anomaly from the Mid-Holocene to the present         | AMAT <sub>mid</sub> |
| Paleoclimate change | MAP anomaly from the Last Glacial Maximum to the present | AMAP <sub>lgm</sub> |
|                     | MAT anomaly from the Last Glacial Maximum to the present | AMAT <sub>lgm</sub> |
|                     | Temperature-change velocity from the LGM to the present  | Velocity            |

### 178 2.2.3 Plant functional traits

179 The functional traits of each plant species include growth form, life form, phyllotaxy, single or  
180 compound leaf, petiole, inflorescence, fruit type, flowering period, fruit ripening period, length of the  
181 flowering period, water ecotypes, leaf length, leaf width and plant height (Table S1). These traits  
182 were looked up in the Flora of Inner Mongolia (Third Edition) or Flora of China (Online Edition)  
183 (<http://www.iplant.cn/frps>). The trait data for leaf length and leaf width were the **median** values  
184 provided in Flora of China (Fig. S2). For example, if the leaf length of *Leymus chinensis* was  
185 described as 7-18 cm in the Flora of China, then leaf length was defined as 12.5 cm.

## 186 **2.3 Aboveground biomass**

187 The aboveground biomass of the community was calculated based on the dry matter accumulation  
188 value ( $\text{g}/\text{m}^2$ ) of all plant samples in each plot, and the average aboveground biomass of each plot in  
189 each quadrat was calculated to represent the aboveground biomass of the plant community ( $\text{g}/\text{m}^2$ ).

## 190 **2.4 Diversity calculations**

### 191 **2.4.1 Taxonomic diversity**

192 We used species richness (SR), Shannon-Wiener index and Pielou index as measures of community  
193 taxonomic diversity. The species richness (number of species/ $\text{m}^2$ ) at each site was calculated as the  
194 average number of species per plot. The Shannon-Wiener index and Pielou index were calculated  
195 using the ‘diversity’ function in the “*vegan*” R package (Oksanen et al., 2020).

### 196 **2.4.2 Functional diversity**

197 The functional richness (FRic), functional evenness (FEve), functional divergence (FDiv), functional  
198 dispersion (FDis) and Rao index (Rao’s Q) were calculated based on the Gower distance of  
199 functional traits using the ‘dbFD’ function in the ‘*FD*’ R package (Laliberté et al., 2015).

### 200 **2.4.3 Phylogenetic diversity**

201 All plant species names recorded in surveys were checked in the plant list ([www.theplantlist.org](http://www.theplantlist.org)) to  
202 obtain acceptable species names. Based on the APG III system (The Angiosperm Phylogeny Group,  
203 2009), we entered the taxonomic information (family/genus/species) of all species into the  
204 Phylomatic online plant database (Phylomatic Version 3, <http://phylodiversity.net/phyloomatic/>),  
205 selected storedtree = “zanne2014 (Zanne et al., 2014)”, and output a phylogenetic tree with branch  
206 length and differentiation time (Fig. S2). Faith’s phylogenetic diversity (PD, the sum of the  
207 phylogenetic branch lengths), the mean pairwise distance (MPD) and the mean nearest taxon

208 distance (MNTD) between species in a community were calculated using the ‘mpd’ function in the  
209 ‘*picante*’ R package (Kembel et al., 2010).

## 210 **2.5 Data analysis**

211 First, we conducted a Random Forest model to estimate the relative importance of the three  
212 dimensions of biodiversity to community biomass. The Random Forest model can alleviate  
213 multicollinearity and complex interactions between independent variables. We built 5000 regression  
214 trees in Random Forest, and each tree was fitted with 2/3 of the data. The other 1/3 of the data was  
215 used to estimate the importance of each predictor variable, which was represented by the increase in  
216 mean square error (MSE). In the Random Forest model, the variables ranked first in terms of  
217 taxonomic, functional and phylogenetic diversity were selected as proxies for the three dimensions of  
218 biodiversity.

219 To explore the influence of climate in different periods and climate anomalies on biodiversity,  
220 we also used the Random Forest model to analyze the relative importance of the present climate, the  
221 Mid-Holocene climate, the Last Glacial Maximum climate, and paleoclimate change on the three  
222 dimensions of biodiversity. To evaluate the relative importance of climate drivers of biodiversity, we  
223 calculated the ratio between the increase in MSE of the predictor and the sum of all the increases in  
224 MSE, which is expressed as a percentage.

225 To study the effects of climate in different periods and climate anomalies on biodiversity and  
226 aboveground biomass, we performed piecewise structural equation models (pSEM) to test the direct  
227 and indirect causal relationships between the climate in different periods and paleoclimate change,  
228 species diversity, functional diversity, phylogenetic diversity and biomass. Model construction  
229 procedures involved the following three stages. First, based on the results of the Random Forest

230 model, we identified the climate variables that significantly affected biodiversity and divided them  
231 into composite variables. The model contained two composite variables that potentially represent  
232 collections of variables in terms of the present climate and paleoclimate change. We calculated  
233 Pearson correlations between the climate factors (Fig. S3) and deleted the predictors with high  
234 correlation coefficients ( $>0.85$ ,  $P < 0.05$ ) to avoid multicollinearity. Before pSEM analysis, all  
235 selected predictors were standardized. Second, principal component analyses (PCAs) were used for  
236 the composite variables with multiple predictors. For each composite variable, the first principal  
237 component (PC1) explained 64~71% of the total variance and was used in the subsequent pSEM  
238 analysis (Table S2). Third, pSEM was developed from the full conceptual model. We fitted the  
239 component models of the piecewise SEM as linear models and reported the standardized coefficient  
240 for each path from each component model. We used Shipley's d-separation test to evaluate the  
241 overall fit of the pSEM, as well as Fisher's C statistic and AIC.

242 We conducted all analyses in R x64 4.0.5. The Random Forest model was conducted using the  
243 'randomForest' function in the 'randomForest' package (Cutler et al., 2007; Breiman et al., 2018),  
244 and the significance of the variables was tested using the 'rp.importance' function in the 'rfPermute'  
245 package (Archer, 2016). PCA was performed using the 'princomp' function in the 'psych' package in  
246 R (Revelle, 2021). Piecewise structural equation modeling was conducted and tested using the  
247 'piecewiseSEM' package (Lefcheck, 2020; Lefcheck and Freckleton, 2015).

### 248 **3. Results**

#### 249 **3.1 Effects of biodiversity on aboveground biomass**

250 Among the 11 biodiversity variables, SR, PD and Pielou index identified by the RF model were the  
251 three most significant predictors influencing aboveground biomass (Fig. 1a). Taken together,

252 taxonomic diversity represented by SR, Pielou and Shannon-Wiener index collectively contributed  
 253 43.78% to the RF model for aboveground biomass, while phylogenetic diversity represented by PD  
 254 (including MNTD and MPD) and functional diversity represented by FRic (including FDiv, FEve,  
 255 FDis and RaoQ) contributed 30.02% and 26.2%, respectively (Fig. 1b).  
 256 Based on the ranking results from the Random Forest model, SR, PD, and FRic were selected as  
 257 agents of taxonomic, functional, and phylogenetic diversity, respectively, and used for subsequent  
 258 analysis.

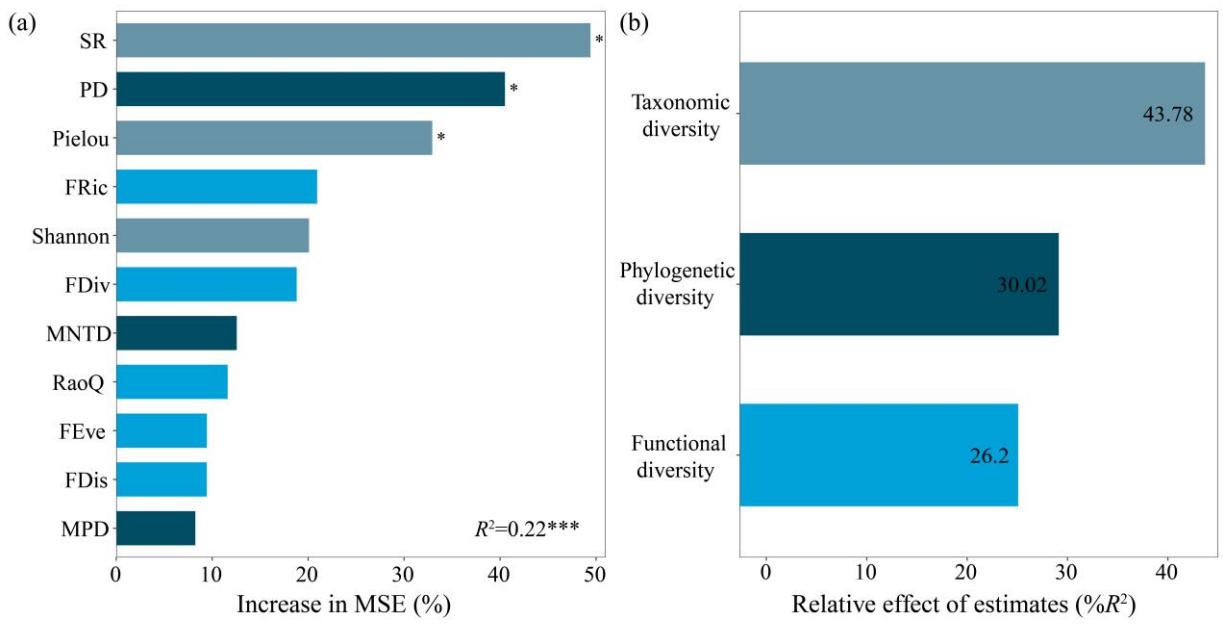

259  
 260 Fig. 1 The importance (a) and relative contributions (b) of the three dimensions of biodiversity to  
 261 community biomass. An increase in MSE denotes an increase in the percentage mean square error.

262 Significance levels are as follows: \*:  $P < 0.05$  and \*\*\*:  $P < 0.001$ .

263 **3.2 Paleoclimate and present climate predictors of contemporary diversity**

264 Random Forest models explained 35% (cross-validation  $R^2 = 0.35$ ,  $P < 0.001$ ), 31% (cross-validation  
 265  $R^2 = 0.31$ ,  $P < 0.001$ ) and 31% (cross-validation  $R^2 = 0.31$ ,  $P < 0.001$ ) of the variance in SR, PD and  
 266 FRic, respectively (Fig. 2). Temperatures in different periods, including  $MAT_{mid}$ ,  $MAT$  and  $MAT_{lgn}$ ,  
 267 were the main factors driving SR and PD ( $P < 0.05$ , Fig. 2a and 2b), followed by climate anomalies

268 in various periods. However, the current climate (i.e., AI, MAT and MAP) had a stronger impact on  
 269 FRic ( $P < 0.05$ , Fig. 2c).

270

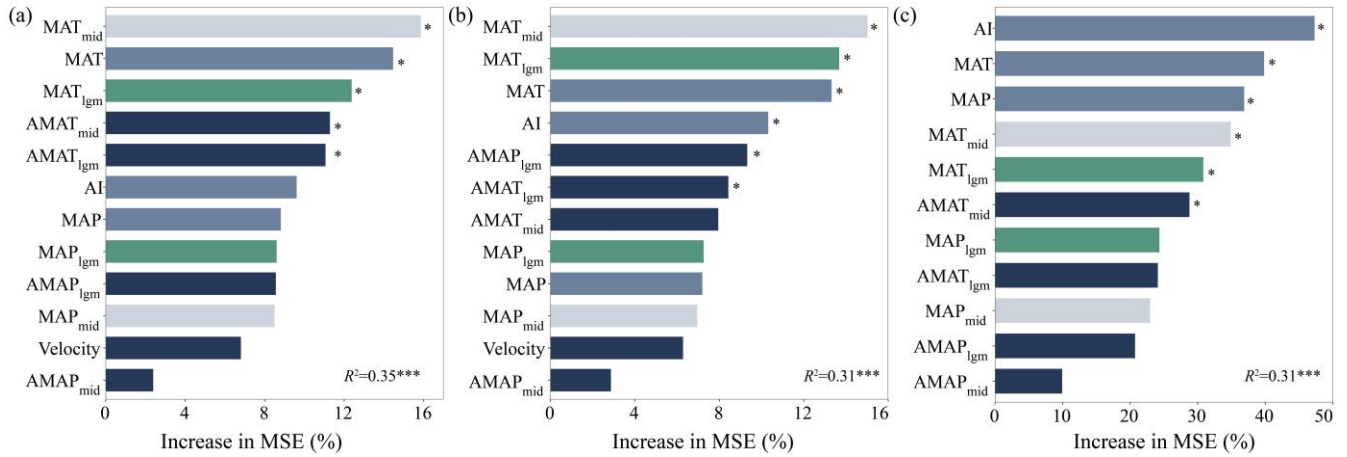

271

272 Fig. 2 The importance of climate variables in different periods and paleoclimate change to species

273 richness (a), phylogenetic diversity (b) and functional richness (c). An increase in MSE denotes an

274 increase in the percentage mean square error. Significance levels are as follows: \*:  $P < 0.05$  and \*\*\*:

275

$$P < 0.001.$$

276

277 In terms of relative contributions, the current climate and the paleoclimate changes had greater

278 impacts on the three dimensions of biodiversity. Paleoclimate change was the best predictor of SR

279 (33.90%) and PD (32.10%). Strikingly, the present climate (38.68%) showed a larger contribution to

280 the prediction of FRic than paleoclimate change (26.06%; Fig. 3).

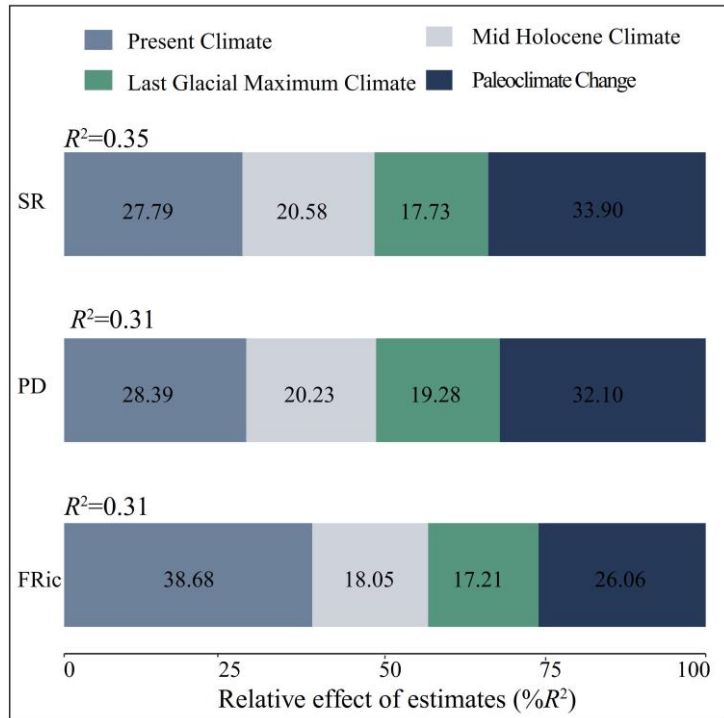

281

282 Fig. 3 Relative contributions of present climate, paleo- (mid-Holocene and Last Glacial Maximum)  
 283 and paleoclimate change as drivers of species richness, phylogenetic diversity and functional  
 284 richness.

### 285 3.3 Influence of climate factors on biodiversity and aboveground biomass

286 The present climate, MAT of the Mid-Holocene and the Last Glacial Maximum, and paleoclimate  
 287 change explained 38% ( $R^2 = 0.38$ ), 33% ( $R^2 = 0.33$ ), 36% ( $R^2 = 0.36$ ) and 29% ( $R^2 = 0.29$ ) of the  
 288 variances in SR, PD, FRic and AGB, respectively (Fig. 4). The present climate had direct and  
 289 indirect significant associations with AGB via all biodiversity variables (Fig. 4). The present climate  
 290 was significantly and positively associated with SR ( $r_{\partial} = 0.46$ ,  $P < 0.05$ ), PD ( $r_{\partial} = 0.35$ ,  $P < 0.05$ )  
 291 and FRic ( $r_{\partial} = 0.58$ ,  $P < 0.05$ , Fig. 4). However, the paleoclimate change had direct significant  
 292 negative effects on SR ( $r_{\partial} = -0.28$ ,  $P < 0.05$ ), PD ( $r_{\partial} = -0.32$ ,  $P < 0.05$ ) and FRic ( $r_{\partial} = -0.25$ ,  $P <$   
 293 0.05, Fig. 4).

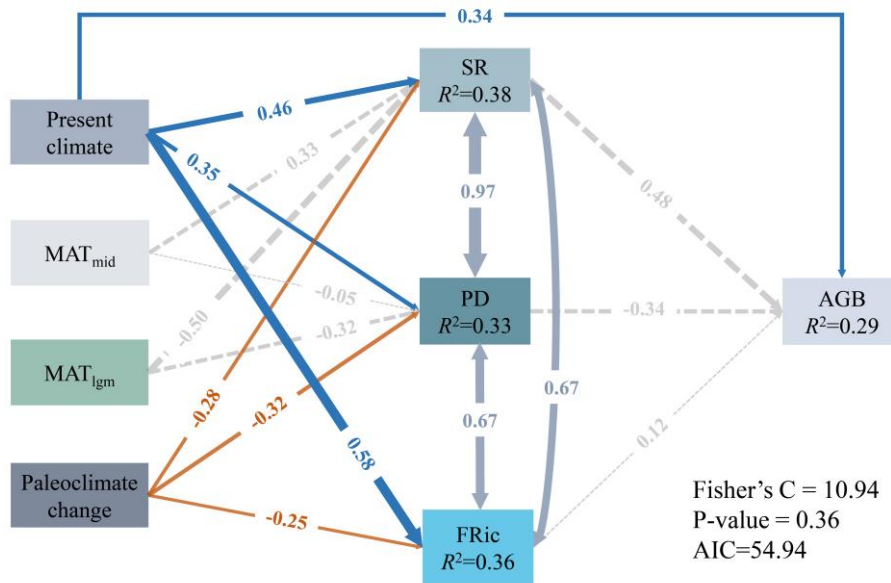

294

295 Fig. 4 SEMs fitted to the effects of climate in different periods and paleoclimate change on diversity

296 and AGB. The present climate is PCA component 1 of the AI and MAT. The paleoclimate change

297 represents a composite variable including MAT anomaly from the Mid-Holocene to the present,

298 MAT and MAP anomaly from the Mid-Holocene to the present. Numbers adjacent to arrows

299 represent the standardized path coefficients ( $r_{\partial}$ ).  $R^2$  indicates the proportion of variance explained.

300 Blue (positive paths) and orange (negative paths) solid arrows indicate significant paths ( $P < 0.05$ ),

301 and gray dashed arrows indicate non-significant paths ( $P > 0.05$ ).

302

303 For the present climate, the direct effects of AI on SR ( $r_{\partial} = 0.33$ ,  $P < 0.05$ ), PD ( $r_{\partial} = 0.27$ ,  $P <$

304  $0.05$ ), FRic ( $r_{\partial} = 0.49$ ,  $P < 0.05$ ), and AGB ( $r_{\partial} = 0.37$ ,  $P < 0.05$ ) were all significantly positive, while

305 the direct effects of MAT on the three dimensions of biodiversity (SR,  $r_{\partial} = -0.34$ ; PD,  $r_{\partial} = -0.36$ ;

306 FRic,  $r_{\partial} = -0.29$ ;  $P < 0.05$  in all cases) were all significantly negative (Fig. 5). In addition, SR ( $r_{\partial} = -$

307  $0.25$ ,  $P < 0.05$ ) and PD ( $r_{\partial} = -0.25$ ,  $P < 0.05$ ) were negatively affected by MAT anomaly from the

308 Mid-Holocene to the present (AMAT<sub>mid</sub>), but FRic ( $r_{\partial} = -0.23$ ,  $P < 0.05$ ) was mainly driven by MAT

309 anomaly from the Last Glacial Maximum to the present (AMAT<sub>lgm</sub>; Fig. 5).



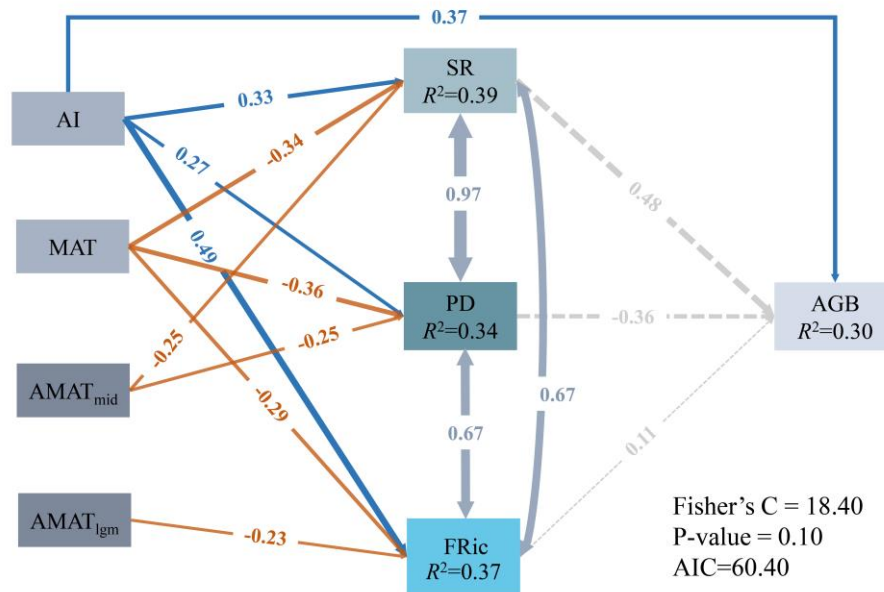

310

311

312

313

314

315

316

317

318

319

320

321

322

323

324

325

Fig. 5 The effects of present climate (AI and MAT) and paleoclimate change (AMAT<sub>mid</sub> and AMAT<sub>lgm</sub>) on diversity and AGB. Numbers adjacent to arrows represent the standardized path coefficients.  $R^2$  indicates the proportion of variance explained. Blue (positive paths) and orange (negative paths) solid arrows indicate significant paths ( $P < 0.05$ ), and gray dashed arrows indicate non-significant paths ( $P > 0.05$ ).

#### 4. Discussion

##### 4.1 The effects of different dimensions of biodiversity on aboveground biomass

Our research showed that, without considering the influence of climatic conditions, taxonomic diversity was the most important factor influencing the aboveground biomass of Mongolian Plateau grasslands, followed by phylogenetic diversity and functional diversity. However, a large number of studies have emphasized the importance of phylogenetic diversity and functional diversity to ecosystem functions (Srivastava et al., 2012; Cadotte et al., 2008; Swenson et al., 2012). For example, research on subtropical forests in northern China showed that functional diversity is more important than taxonomic diversity in controlling aboveground biomass, which is related to the acquisitive resource use strategy of functional traits (Hanif et al., 2019). However, in Mongolian

326 Plateau grasslands taxonomic diversity may be more critical. Selection effects and compensatory  
327 effects are the main mechanisms through which biodiversity impacts on biomass. The grassland  
328 community structure of the Mongolian Plateau is relatively simple, and biomass mainly depends on  
329 the number or dominance of dominant species. However, functional traits considered in this study,  
330 such as leaf size and plant height, do not have a strong impact on biomass. The Mongolian Plateau is  
331 located in an arid and semi-arid area, and drought-tolerant species invest a lot in seed resources, leaf  
332 structure and root biomass (Wolf et al., 2021). Studies have shown that these traits are negatively  
333 correlated with aboveground biomass, while functional traits consistent with growth strategies, such  
334 as leaf nitrogen concentration and photosynthetic utilization efficiency, can promote aboveground  
335 biomass (Wolf et al., 2021).

336 Secondly, phylogenetic diversity also had a significant impact on aboveground biomass.  
337 Phylogenetic diversity contains the evolutionary information of species ecology. It is influenced by  
338 the average degree of correlation between species and the number of existing species, and can reflect  
339 the evolutionary sequence of characteristics related to habitat and resource utilization (Srivastava et  
340 al., 2012). If species make better use of all available resources, productivity may increase. Therefore,  
341 our research suggests that protecting taxonomic diversity and conserving evolutionarily different  
342 species are equally important in effectively maintaining high-yielding communities.

#### 343 **4.2 Relationship between paleoclimate anomalies and current biodiversity patterns**

344 **Although a rich body of research has explored** the factors affecting biodiversity patterns and their  
345 relationships with biomass, **further studies are still needed.** Here, our results showed that  
346 paleoclimate changes and present climate factors were critical variables influencing contemporary  
347 biodiversity patterns. This illustrates the importance of historical factors, such as evolution, as well

348 as contemporary factors, such as climate, in determining the geographic ranges of species and the  
349 accumulation of species in the region (Fine, 2015). Previous studies aiming to explain patterns of  
350 biodiversity have focused on the current climate (Harrison et al., 2015), energy (Kreft and Jetz,  
351 2007), soil attributions (Ulrich et al., 2014), human activities (Hautier et al., 2015; Newbold et al.,  
352 2015) or water availability (Jiao et al., 2021; Liu et al., 2021). Modern climate research on  
353 biodiversity and ecosystem functions has been widely confirmed (Yang et al., 2011; Liu et al., 2021;  
354 Walther et al., 2002), but our research shows that the pattern of biodiversity is also affected by past  
355 climates, **and especially climate change** in a region. **Paleoclimate changes filtered** the regional  
356 species pool based on climate-related traits, which in turn affected contemporary biodiversity  
357 patterns.

358 Species richness is affected by the significant positive effects of AI, and the significant negative  
359 effects of MAT and AMAT<sub>mid</sub>. Jansson's research showed that the total number of vascular plant  
360 species decreased with increasing temperature change since the LGM in mainland areas (Jansson,  
361 2003), which is inconsistent with our results. We found that the species richness of Mongolian  
362 Plateau grassland is more affected by temperature changes since the Mid-Holocene. In Europe, the  
363 richness of widespread species was largely controlled by the modern climate, while the LGM climate  
364 and climatic heterogeneity were codominant with modern climate as controls of richness for  
365 restricted and intermediate species, which appear to still be associated with their glacial refugia  
366 (Svenning and Skov, 2007b).

367 Phylogenetic diversity (PD) is usually used to quantify the uniqueness of a region's evolution.  
368 Our research showed that PD was negatively correlated with **MAT and temperature** anomalies in the  
369 Mid-Holocene, but not significantly related to temperature anomalies during the Last Glacial

370 Maximum. However, the PD of global forest ecosystems is positively associated with temperature  
371 and precipitation and is negatively associated with Quaternary precipitation change (Kubota et al.,  
372 2018). Phylogenetic studies reveal that major ecological niches are more conserved through  
373 evolutionary history than expected, implying that adaptations to major climate changes have not  
374 readily been accomplished in all lineages (Donoghue, 2008).

375 Our results suggested that functional richness was negatively related to Last Glacial Maximum  
376 climate anomaly. This may be due to the tolerance of plant traits to past climatic conditions (Bhagwat  
377 and Willis, 2008) and the postglacial migration lag (Svenning et al., 2008). In the Late Quaternary,  
378 the Mongolian Plateau experienced severe alternating dry and wet climate fluctuations (Tian et al.,  
379 2017), and likely experienced a non-random removal of functional combinations and change in  
380 functional diversity (Ordonez and Svenning, 2017). Previous research has indicated that the  
381 magnitude of past glacial-to-interglacial warming was sufficient at most locations across the globe  
382 (including the Mongolian Plateau) to drive moderate to large changes in vegetation composition and  
383 structure (Nolan et al., 2018). When climate changes, inappropriate species may be quickly ruled out,  
384 and appropriate species may migrate more slowly, resulting in a negative correlation between the  
385 paleoclimate anomaly and contemporary FD in the Mongolian Plateau. This is also limited by the  
386 spreading ability or migration potential of plants after the glaciers, when species with inappropriate  
387 characteristics disappeared from the community and were not replaced by other species (Blonder et  
388 al., 2018). Studies in Europe indicate that the lagging effect of glacial-interglacial climate instability  
389 and accessibility on functional diversity is >10,000 years (Ordonez and Svenning, 2015).

390 The influence of paleoclimate anomalies on contemporary species and phylogeny diversity may  
391 be caused by climate change and human activities in the Mongolian Plateau grasslands. In the eastern

392 part of the Mongolian Plateau, the interval of 35230 to 25150 yr B.P. was a forest-steppe landscape  
393 under humid conditions, represented by Pinaceae, Compositae and Chenopodiaceae (Tian et al.,  
394 2017). Subsequently, the forest patches gradually shrank, the vegetation transitioned to the steppe  
395 landscape, and drought began to intensify. During the Last Glacial Maximum period, the vegetation  
396 types on the Mongolian Plateau were mainly ~~polar and alpine deserts and temperate deserts~~ (Ray and  
397 Adams, 2001), and the main plants were Compositae and Chenopodiaceae. By the Holocene,  
398 xerophytes had declined sharply, and plants of humid climates had increased. The humidity increased  
399 during the early Holocene, and generally humid conditions lasted from 10,400 until 7000 yr BP and  
400 the region experienced the Lavliakan humid phase (Lioubimtseva, 2004; Yin et al., 2011), with more  
401 hygrophilous species, such as Cyperaceae (Tian et al., 2017). This climate condition was also  
402 conducive to the development and spread of Compositae and Gramineae families in the steppes of  
403 Central Asia (Lioubimtseva, 2004). Since approximately 5200 yr BP to present, the climate has  
404 become more arid, with corresponding vegetation change and strong aeolian activity (Yin et al.,  
405 2011). Furthermore, palaeoecological and archaeological evidence shows that people have shaped  
406 most of terrestrial nature for at least 12,000 years, including burning, hunting, cultivation and  
407 domestication (Ellis et al., 2021). In the Mongolian Plateau, especially in the Inner Mongolia region  
408 of northern China, grazing appeared at ~5.7–5.5 ka and further intensified again after ~4.2–4.0 ka  
409 (Huang et al., 2021). The intensification of grazing activities also causes changes in biodiversity.

410 As far as aboveground biomass is concerned, after taking into account climatic factors, it is  
411 mainly directly affected by aridity index, while the three dimensions of biodiversity have no  
412 significant impact on it, which is consistent with **our previous research (Li et al., 2020)**. Paleoclimate  
413 changes also have no direct effects on aboveground biomass, which indirectly affects aboveground

414 biomass through regulating biodiversity.

## 415 **5. Conclusion**

416 We conclude that unique evolutionary and ecological histories played key roles in explaining  
417 biodiversity patterns in the Mongolian Plateau. When climatic conditions are not considered,  
418 taxonomic diversity, phylogenetic diversity and functional diversity all have effects on community  
419 biomass, and taxonomic diversity has a more obvious impact on biomass. However, the climate after  
420 the Last Glacial Maximum has left a strong legacy affecting contemporary biodiversity patterns.  
421 These findings extend our understanding of the spatial and temporal scale of climate effects on  
422 biodiversity and aboveground biomass, providing additional confidence that the paleoclimate had a  
423 key role in shaping contemporary biodiversity patterns.

424

## 425 **Authors' Contributions**

426 Z. Li analyzed the data and wrote the first draft of the manuscript. Zh. Li, J. Zhang, G. Han, F.Y. Li  
427 and C. Liang contributed to later versions of the manuscript and all authors provided constructive  
428 comments to improve the manuscript. F.Y. Li and C. Liang designed and led the field survey. Z. Li,  
429 Zh. Li, X. Tong, J. Zhang, L. Dong, Y. Zheng, B. Miao, W. Ma, L. Zhao, L. Wang, L. Wen, C. Liang  
430 and F.Y. Li conducted the experiment and collected the data.

## 431 **Data available**

432 The data that support the findings of this study are available on request from the corresponding  
433 author.

## 434 **Conflict of interest statement**

435 The authors declare that they have no conflict of interest.

436 **Acknowledgements**

437 This study was supported by National Natural Science Foundation of China (31960261), the Science  
438 and Technology Program of Inner Mongolia Autonomous Region of China (2020GG0126), the  
439 Natural Science Foundation of Inner Mongolia Autonomous Region of China (2020MS03026),  
440 Major Science and Technology Project in Inner Mongolia Autonomous Region (zdzx2018020), Inner  
441 Mongolia Autonomous Region Science and Technology Achievement Transformation Project  
442 (2019CG069), and the Innovative Team of the Ministry of Education of China (IRT\_17R59).

443

444 **References**

- 445 Archer, E.: rfPermute: Estimate Permutation p-Values for Random Forest Importance Metrics, 2016.
- 446 Avolio, M. L., Komatsu, K. J., Collins, S. L., Grman, E., Koerner, S. E., Tredennick, A. T., Wilcox, K. R., Baer,  
447 S., Boughton, E. H., Britton, A. J., Foster, B., Gough, L., Hovenden, M., Isbell, F., Jentsch, A., Johnson, D. S.,  
448 Knapp, A. K., Kreyling, J., Langley, J. A., Lortie, C., McCulley, R. L., McLaren, J. R., Reich, P. B., Seabloom,  
449 E. W., Smith, M. D., Suding, K. N., Suttle, K. B., and Tognetti, P. M.: Determinants of community compositional  
450 change are equally affected by global change, *Ecology letters*, 24, 1892-1904, 10.1111/ele.13824, 2021.
- 451 Bhagwat, S. A. and Willis, K. J.: Species persistence in northerly glacial refugia of Europe: a matter of chance  
452 or biogeographical traits?, *Biogeogr*, 35, 464-482, 10.1111/j.1365-2699.2007.01861.x, 2008.
- 453 Blonder, B., Enquist, B. J., Graae, B. J., Kattge, J., Maitner, B. S., Morueta-Holme, N., Ordonez, A., Simova, I.,  
454 Singarayer, J., Svenning, J. C., Valdes, P. J., and Violle, C.: Late Quaternary climate legacies in contemporary  
455 plant functional composition, *Glob Chang Biol*, 24, 4827-4840, 10.1111/gcb.14375, 2018.
- 456 Breiman, L., Cutler, A., Liaw, A., and MatthewWiener: Package ‘randomForest’: Breiman and Cutler's Random

457 Forests for Classification and Regression, 2018.

458 Butler, E. E., Datta, A., Flores-Moreno, H., Chen, M., Wythers, K. R., Fazayeli, F., Banerjee, A., Atkin, O. K.,  
459 Kattge, J., Amiaud, B., Blonder, B., Boenisch, G., Bond-Lamberty, B., Brown, K. A., Byun, C., Campetella, G.,  
460 Cerabolini, B. E. L., Cornelissen, J. H. C., Craine, J. M., Craven, D., de Vries, F. T., Diaz, S., Domingues, T. F.,  
461 Forey, E., Gonzalez-Melo, A., Gross, N., Han, W., Hattingh, W. N., Hickler, T., Jansen, S., Kramer, K., Kraft,  
462 N. J. B., Kurokawa, H., Laughlin, D. C., Meir, P., Minden, V., Niinemets, U., Onoda, Y., Penuelas, J., Read, Q.,  
463 Sack, L., Schamp, B., Soudzilovskaia, N. A., Spasojevic, M. J., Sosinski, E., Thornton, P. E., Valladares, F., van  
464 Bodegom, P. M., Williams, M., Wirth, C., and Reich, P. B.: Mapping local and global variability in plant trait  
465 distributions, PNAS, 114, E10937-E10946, 10.1073/pnas.1708984114, 2017.

466 Cadotte, M. W., Cardinale, B. J., and Oakley, T. H.: Evolutionary history and the effect of biodiversity on plant  
467 productivity, PNAS, 105, 17012-17017, 10.1073/pnas.0805962105, 2008.

468 Cavender-Bares, J., Kozak, K. H., Fine, P. V., and Kembel, S. W.: The merging of community ecology and  
469 phylogenetic biology, Ecology letters, 12, 693-715, 10.1111/j.1461-0248.2009.01314.x, 2009.

470 Cutler, D. R., Edwards, J. T. C., Beard, K. H., Cutler, A., Hess, K. T., Gibson, J., and Lawler, J. J.: Random  
471 forest for classification ecology, Ecology, 88, 2783-2792, 10.1890/07-0539.1 2007.

472 Diaz, S., Kattge, J., Cornelissen, J. H., Wright, I. J., Lavorel, S., Dray, S., Reu, B., Kleyer, M., Wirth, C., Prentice,  
473 I. C., Garnier, E., Bonisch, G., Westoby, M., Poorter, H., Reich, P. B., Moles, A. T., Dickie, J., Gillison, A. N.,  
474 Zanne, A. E., Chave, J., Wright, S. J., Sheremet'ev, S. N., Jactel, H., Baraloto, C., Cerabolini, B., Pierce, S.,  
475 Shipley, B., Kirkup, D., Casanoves, F., Joswig, J. S., Gunther, A., Falczuk, V., Ruger, N., Mahecha, M. D., and  
476 Gorne, L. D.: The global spectrum of plant form and function, Nature, 529, 167-171, 10.1038/nature16489,



477 2016.

478 Donoghue, M. J.: A phylogenetic perspective on the distribution of plant diversity, PNAS, 105, 11549-11555,  
479 10.1073/pnas.0801962105, 2008.

480 Eiserhardt, W. L., Borchsenius, F., Plum, C. M., Ordonez, A., and Svenning, J.-C.: Climate-driven extinctions  
481 shape the phylogenetic structure of temperate tree floras, Ecology letters, 18, 263-272, 10.1111/ele.12409, 2015.

482 Ellis, E. C., Gauthier, N., Klein Goldewijk, K., Bliege Bird, R., Boivin, N., Diaz, S., Fuller, D. Q., Gill, J. L.,  
483 Kaplan, J. O., Kingston, N., Locke, H., McMichael, C. N. H., Ranco, D., Rick, T. C., Shaw, M. R., Stephens,  
484 L., Svenning, J.-C., and Watson, J. E. M.: People have shaped most of terrestrial nature for at least 12,000 years,  
485 PNAS, 118, 10.1073/pnas.2023483118, 2021.

486 Esquivel-Muelbert, A., Baker, T. R., Dexter, K. G., Lewis, S. L., Brienen, R. J. W., Feldpausch, T. R., Lloyd, J.,  
487 Monteagudo-Mendoza, A., Arroyo, L., Alvarez-Davila, E., Higuchi, N., Marimon, B. S., Marimon-Junior, B.  
488 H., Silveira, M., Vilanova, E., Gloor, E., Malhi, Y., Chave, J., Barlow, J., Bonal, D., Davila Cardozo, N., Erwin,  
489 T., Fauset, S., Herault, B., Laurance, S., Poorter, L., Qie, L., Stahl, C., Sullivan, M. J. P., Ter Steege, H., Vos, V.  
490 A., Zuidema, P. A., Almeida, E., Almeida de Oliveira, E., Andrade, A., Vieira, S. A., Aragao, L., Araujo-  
491 Murakami, A., Arets, E., Aymard, C. G., Baraloto, C., Camargo, P. B., Barroso, J. G., Bongers, F., Boot, R.,  
492 Camargo, J. L., Castro, W., Chama Moscoso, V., Comiskey, J., Cornejo Valverde, F., Lola da Costa, A. C., Del  
493 Aguila Pasquel, J., Di Fiore, A., Fernanda Duque, L., Elias, F., Engel, J., Flores Llampazo, G., Galbraith, D.,  
494 Herrera Fernandez, R., Honorio Coronado, E., Hubau, W., Jimenez-Rojas, E., Lima, A. J. N., Umetsu, R. K.,  
495 Laurance, W., Lopez-Gonzalez, G., Lovejoy, T., Aurelio Melo Cruz, O., Morandi, P. S., Neill, D., Nunez Vargas,  
496 P., Pallqui Camacho, N. C., Parada Gutierrez, A., Pardo, G., Peacock, J., Pena-Claros, M., Penuela-Mora, M.  
497 C., Petronelli, P., Pickavance, G. C., Pitman, N., Prieto, A., Quesada, C., Ramirez-Angulo, H., Rejou-Mechain,

498 M., Restrepo Correa, Z., Roopsind, A., Rudas, A., Salomao, R., Silva, N., Silva Espejo, J., Singh, J., Stropp, J.,  
499 Terborgh, J., Thomas, R., Toledo, M., Torres-Lezama, A., Valenzuela Gamarra, L., van de Meer, P. J., van der  
500 Heijden, G., van der Hout, P., Vasquez Martinez, R., Vela, C., Vieira, I. C. G., and Phillips, O. L.: Compositional  
501 response of Amazon forests to climate change, *Glob Chang Biol*, 25, 39-56, 10.1111/gcb.14413, 2019.

502 Fine, P. V. A.: Ecological and Evolutionary Drivers of Geographic Variation in Species Diversity, *Annu Rev*  
503 *Ecol Evol Syst*, 46, 369-392, 10.1146/annurev-ecolsys-112414-054102, 2015.

504 Flynn, D. F. B., Mirotchnick, N., Jain, M., Palmer, M. I., and Naeem, S.: Functional and phylogenetic diversity  
505 as predictors of biodiversity-ecosystem-function relationships, *Ecology*, 92, 1573-1581, 10.1890/10-1245.1,  
506 2011.

507 Fordham, D. A., Jackson, S. T., Brown, S. C., Huntley, B., Brook, B. W., Dahl-Jensen, D., Gilbert, M. T. P.,  
508 Otto-Bliesner, B. L., Svensson, A., Theodoridis, S., Wilmshurst, J. M., Buettel, J. C., Canteri, E., McDowell,  
509 M., Orlando, L., Pilowsky, J., Rahbek, C., and Nogues-Bravo, D.: Using paleo-archives to safeguard  
510 biodiversity under climate change, *Science*, 369, eabc5654, 10.1126/science.abc5654, 2020.

511 Hanif, M. A., Yu, Q., Rao, X., and Shen, W.: Disentangling the Contributions of Plant Taxonomic and Functional  
512 Diversities in Shaping Aboveground Biomass of a Restored Forest Landscape in Southern China, *Plants (Basel)*,  
513 8, 612, 10.3390/plants8120612, 2019.

514 Harrison, S. P., Gornish, E. S., and Copeland, S.: Climate-driven diversity loss in a grassland community, *PNAS*,  
515 112, 8672-8677, 10.1073/pnas.1502074112, 2015.

516 Hautier, Y., Tilman, D., Isbell, F., Seabloom, E. W., Borer, E. T., and Reich, P. B.: Anthropogenic environmental  
517 changes affect ecosystem stability via biodiversity, *Science*, 348, 336-340, 10.1126/science.aaa1788, 2015.

518 Hooper, D. U., Chapin, F. S., Ewel, J. J., Hector, A., Inchausti, P., Lavorel, S., Lawton, J. H., Lodge, D. M.,  
519 Loreau, M., Naeem, S., Schmid, B., Setälä, H., Symstad, A. J., J., V., and Wardle, D. A.: Effects of biodiversity  
520 on ecosystem functioning: a consensus of current knowledge, *Ecol Monogr*, 75, 3-35, 10.1890/04-0922 2005.

521 Huang, X., Zhang, J., Ren, L., Zhang, S., and Chen, F.: Intensification and Driving Forces of Pastoralism in  
522 Northern China 5.7 ka Ago, *Geophys Res Lett*, 48, e2020GL092288, 10.1029/2020GL092288, 2021.

523 Isbell, F., Calcagno, V., Hector, A., Connolly, J., Harpole, W. S., Reich, P. B., Scherer-Lorenzen, M., Schmid,  
524 B., Tilman, D., van Ruijven, J., Weigelt, A., Wilsey, B. J., Zavaleta, E. S., and Loreau, M.: High plant diversity  
525 is needed to maintain ecosystem services, *Nature*, 477, 199-202, 10.1038/nature10282, 2011.

526 Jansson, R.: Global patterns in endemism explained by past climatic change, *Proc Biol Sci*, 270, 583-590,  
527 10.1098/rspb.2002.2283, 2003.

528 Jiao, W., Wang, L., Smith, W. K., Chang, Q., Wang, H., and D'Odorico, P.: Observed increasing water constraint  
529 on vegetation growth over the last three decades, *Nature communications*, 12, 3777, 10.1038/s41467-021-  
530 24016-9, 2021.

531 Karger, D. N., Conrad, O., Böhner, J., Kawohl, T., Kreft, H., Soria-Auza, R. W., Zimmermann, N. E., Linder,  
532 H. P., and Kessler, M.: Climatologies at high resolution for the earth's land surface areas, *Sci Data*, 4, 170122,  
533 10.1038/sdata.2017.122, 2017.

534 Kembel, S. W., Cowan, P. D., Helmus, M. R., Cornwell, W. K., Morlon, H., Ackerly, D. D., Blomberg, S. P.,  
535 and Webb, C. O.: Picante: R tools for integrating phylogenies and ecology, *Bioinformatics*, 26, 1463-1464,  
536 10.1093/bioinformatics/btq166, 2010.

537 Kissling, W. D., Eiserhardt, W. L., Baker, W. J., Borchsenius, F., Couvreur, T. L., Balslev, H., and Svenning, J.  
538 C.: Cenozoic imprints on the phylogenetic structure of palm species assemblages worldwide, PNAS, 109, 7379-  
539 7384, 10.1073/pnas.1120467109, 2012.

540 Kreft, H. and Jetz, W.: Global patterns and determinants of vascular plant diversity, PNAS, 104, 5925-5930,  
541 10.1073/pnas.0608361104, 2007.

542 Kubota, Y., Kusumoto, B., Shiono, T., Ulrich, W., and Duarte, L.: Environmental filters shaping angiosperm  
543 tree assembly along climatic and geographic gradients, Journal of Vegetation Science, 29, 607-618,  
544 10.1111/jvs.12648, 2018.

545 Laliberté, E., Legendre, P., and Shipley, B.: Package ‘FD’: Measuring functional diversity (FD) from multiple  
546 traits, and other tools for functional ecology, 2015.

547 Lefcheck, J.: Package ‘piecewiseSEM’: Piecewise Structural Equation Modeling, 2020.

548 Lefcheck, J. S. and Freckleton, R.: piecewiseSEM: Piecewise structural equation modelling in r for ecology,  
549 evolution, and systematics, Methods Ecol Evol, 7, 573-579, 10.1111/2041-210x.12512, 2015.

550 Li, Z., Li, Z., Tong, X., Zhang, J., Dong, L., Zheng, Y., Ma, W., Zhao, L., Wang, L., Wen, L., Dang, Z.,  
551 Tuvshintogtokh, I., Liang, C., and Li, F. Y.: Climatic humidity mediates the strength of the species richness–  
552 biomass relationship on the Mongolian Plateau steppe, The Science of the total environment, 718, 137252,  
553 10.1016/j.scitotenv.2020.137252, 2020.

554 Lioubimtseva, E.: Climate change in arid environments: revisiting the past to understand the future, Prog Phys  
555 Geogr, 28, 502-530, 10.1191/0309133304pp422oa, 2004.

556 Liu, D., Zhang, C., Ogaya, R., Fernandez-Martinez, M., Pugh, T. A. M., and Penuelas, J.: Increasing climatic  
557 sensitivity of global grassland vegetation biomass and species diversity correlates with water availability, *The*  
558 *New phytologist*, 230, 1761-1771, 10.1111/nph.17269, 2021.

559 Liu, H., Mi, Z., Lin, L., Wang, Y., Zhang, Z., Zhang, F., Wang, H., Liu, L., Zhu, B., Cao, G., Zhao, X., Sanders,  
560 N. J., Classen, A. T., Reich, P. B., and He, J. S.: Shifting plant species composition in response to climate change  
561 stabilizes grassland primary production, *PNAS*, 115, 4051-4056, 10.1073/pnas.1700299114, 2018.

562 Maestre, F. T., Benito, B. M., Berdugo, M., Concostrina-Zubiri, L., Delgado-Baquerizo, M., Eldridge, D. J.,  
563 Guirado, E., Gross, N., Kefi, S., Le Bagousse-Pinguet, Y., Ochoa-Hueso, R., and Soliveres, S.: Biogeography  
564 of global drylands, *The New phytologist*, 231, 540-558, 10.1111/nph.17395, 2021.

565 Mayle, F. E., Burn, M. J., Power, M., and Urrego, D. H.: *Past Climate Variability in South America and*  
566 *Surrounding Regions*, Springer2009.

567 Mottl, O., Flantua, S. G. A., Bhatta, K. P., Felde, V. A., Giesecke, T., Goring, S., Grimm6, E. C., Haberle, S.,  
568 Hooghiemstra, H., Ivory, S., Kuneš, P., Wolters, S., Seddon, A. W. R., and Williams, J. W.: Global acceleration  
569 in rates of vegetation change over the past 18,000 years, *Science*, 372, 860–864, 10.1126/science.abg1685, 2021.

570 Newbold, T., Hudson, L. N., Hill, S. L., Contu, S., Lysenko, I., Senior, R. A., Borger, L., Bennett, D. J., Choimes,  
571 A., Collen, B., Day, J., De Palma, A., Diaz, S., Echeverria-Londono, S., Edgar, M. J., Feldman, A., Garon, M.,  
572 Harrison, M. L., Alhousseini, T., Ingram, D. J., Itescu, Y., Kattge, J., Kemp, V., Kirkpatrick, L., Kleyer, M.,  
573 Correia, D. L., Martin, C. D., Meiri, S., Novosolov, M., Pan, Y., Phillips, H. R., Purves, D. W., Robinson, A.,  
574 Simpson, J., Tuck, S. L., Weiher, E., White, H. J., Ewers, R. M., Mace, G. M., Scharlemann, J. P., and Purvis,  
575 A.: Global effects of land use on local terrestrial biodiversity, *Nature*, 520, 45-50, 10.1038/nature14324, 2015.

576 Nolan, C., Overpeck, J. T., Allen, J. R. M., Anderson, P. M., Betancourt, J. L., Binney, H. A., Brewer, S., Bush,  
577 M. B., Chase, B. M., Cheddadi, R., Djamali, M., Dodson, J., Edwards, M. E., Gosling, W. D., Haberle, S.,  
578 Hotchkiss, S. C., Huntley, B., Ivory, S. J., Kershaw, A. P., Kim, S.-H., Latorre, C., Leydet, M., Lézine, A.-M.,  
579 Liu, K.-B., Liu, Y., Lozhkin, A. V., McGlone, M. S., Marchant, R. A., Momohara, A., Moreno, P. I., Müller, S.,  
580 Otto-Bliesner, B. L., Shen, C., Stevenson, J., Takahara, H., Tarasov, P. E., Tipton, J., Vincens, A., Weng, C., Xu,  
581 Q., Zheng, Z., and Jackson, S. T.: Past and future global transformation of terrestrial ecosystems under climate  
582 change, *Science*, 361, 920–923, 10.1126/science.aan5360, 2018.

583 Oksanen, J., Blanchet, F. G., Friendly, M., Kindt, R., Legendre, P., McGlinn, D., Minchin, P. R., O'Hara, R. B.,  
584 Simpson, G. L., Solymos, P., Stevens, M. H. H., Szoecs, E., and Wagner, H.: Package 'vegan': Community  
585 Ecology Package, 2020.

586 Ordonez, A. and Svenning, J.-C.: Geographic patterns in functional diversity deficits are linked to glacial-  
587 interglacial climate stability and accessibility, *Glob Ecol Biogeogr*, 24, 826-837, 10.1111/geb.12324, 2015.

588 Ordonez, A. and Svenning, J.-C.: Consistent role of Quaternary climate change in shaping current plant  
589 functional diversity patterns across European plant orders, *Sci Rep*, 7, 42988, 10.1038/srep42988, 2017.

590 Ray, N. and Adams, J. M.: A GIS-based Vegetation Map of the World at the Last Glacial Maximum (25,000-  
591 15,000 BP), *IA*, 10.11141/ia.11.2, 2001.

592 Revelle, W.: Package 'psych': Procedures for Psychological, Psychometric, and Personality Research, 2021.

593 Sandel, B., Arge, L., Dalsgaard, B., Davies, R. G., Gaston, K. J., Sutherland, W. J., and Svenning, J. C.: The  
594 influence of Late Quaternary climate-change velocity on species endemism, *Science*, 334, 660-664,  
595 10.1126/science.1210173, 2011.

596 Seddon, A. W. R., Macias-Fauria, M., and Willis, K. J.: Climate and abrupt vegetation change in Northern  
597 Europe since the last deglaciation, *Holocene*, 25, 25-36, 10.1177/0959683614556383, 2014.

598 Srivastava, D. S., Cadotte, M. W., MacDonald, A. A., Marushia, R. G., and Mirotchnick, N.: Phylogenetic  
599 diversity and the functioning of ecosystems, *Ecology letters*, 15, 637-648, 10.1111/j.1461-0248.2012.01795.x,  
600 2012.

601 Svenning, J.-C. and Skov, F.: Could the tree diversity pattern in Europe be generated by postglacial dispersal  
602 limitation?, *Ecology letters*, 10, 453-460, 10.1111/j.1461-0248.2007.01038.x, 2007a.

603 Svenning, J.-C. and Skov, F.: Ice age legacies in the geographical distribution of tree species richness in Europe,  
604 *Glob Ecol Biogeogr*, 16, 234–245, 10.1111/j.1466-822x.2006.00280.x, 2007b.

605 Svenning, J.-C., S., N., and F., S.: Postglacial dispersal limitation of widespread forest plant species in  
606 Europe, *Ecography*, 31, 316-326, 10.1111/j.2008.0906-7590.05206.x, 2008.

607 Svenning, J.-C., Eiserhardt, W. L., Normand, S., Ordonez, A., and Sandel, B.: The Influence of Paleoclimate on  
608 Present-Day Patterns in Biodiversity and Ecosystems, *Annu Rev Ecol Evol Syst*, 46, 551-572, 10.1146/annurev-  
609 ecolsys-112414-054314, 2015.

610 Swenson, N. G.: The role of evolutionary processes in producing biodiversity patterns, and the interrelationships  
611 between taxonomic, functional and phylogenetic biodiversity, *Am J Bot*, 98, 472-480, 10.3732/ajb.1000289,  
612 2011.

613 Swenson, N. G., Erickson, D. L., Mi, X., Bourg, N. A., Forero-Montaña, J., Ge, X., Howe, R., Lake, J. K., Liu,  
614 X., Ma, K., Pei, N., Thompson, J., Uriarte, M., Wolf, A., Wright, S. J., Ye, W., Zhang, J., Zimmerman, J. K., and

615 Kress, W. J.: Phylogenetic and functional alpha and beta diversity in temperate and tropical tree communities,  
616 *Ecology*, 93, S112–S125, 10.1890/11-0402.1, 2012.

617 The Angiosperm Phylogeny Group: An update of the Angiosperm Phylogeny Group classification for the orders  
618 and families of flowering plants APG II, *Bot J Linn Soc*, 161, 105-121, 10.1111/boj.12385, 2009.

619 Tian, F., Wang, Y., Chi, Z., Liu, J., Yang, H., Jiang, N., and Tang, W.: Late Quaternary vegetation and climate  
620 reconstruction based on pollen data from southeastern Inner Mongolia, China, *Rev Palaeobot Palynol*, 242, 33-  
621 42, 10.1016/j.revpalbo.2017.03.003, 2017.

622 Trabucco, A. and Zomer, R. J.: Global Aridity Index and Potential Evapo-Transpiration (ET0) Climate Database  
623 v2, 10.6084/m9.figshare.7504448.v3, 2019.

624 Ulrich, W., Soliveres, S., Maestre, F. T., Gotelli, N. J., Quero, J. L., Delgado-Baquerizo, M., Bowker, M. A.,  
625 Eldridge, D. J., Ochoa, V., Gozalo, B., Valencia, E., Berdugo, M., Escolar, C., Garcia-Gomez, M., Escudero, A.,  
626 Prina, A., Alfonso, G., Arredondo, T., Bran, D., Cabrera, O., Cea, A., Chaieb, M., Contreras, J., Derak, M.,  
627 Espinosa, C. I., Florentino, A., Gaitan, J., Muro, V. G., Ghiloufi, W., Gomez-Gonzalez, S., Gutierrez, J. R.,  
628 Hernandez, R. M., Huber-Sannwald, E., Jankju, M., Mau, R. L., Hughes, F. M., Miriti, M., Moneris, J.,  
629 Muchane, M., Naseri, K., Pucheta, E., Ramirez-Collantes, D. A., Raveh, E., Romao, R. L., Torres-Diaz, C., Val,  
630 J., Veiga, J. P., Wang, D., Yuan, X., and Zaady, E.: Climate and soil attributes determine plant species turnover  
631 in global drylands, *J Biogeogr*, 41, 2307-2319, 10.1111/jbi.12377, 2014.

632 Van der Plas, F.: Biodiversity and ecosystem functioning in naturally assembled communities, *Biol. rev*, 94,  
633 1220-1245, 2019.

634 Walther, G.-R., Post, E., Convey, P., Menzel, A., Parmesan, C., Beebee, T. J. C., Fromentin, J.-M., Hoegh-



635 Guldberg, O., and Bairlein, F.: Ecological responses to recent climate change, *Nature*, 416, 389-395,  
636 10.1038/416389a, 2002.

637 Wolf, A. A., Funk, J. L., Selmants, P. C., Morozumi, C. N., Hernandez, D. L., Pasari, J. R., and Zavaleta, E. S.:  
638 Trait-based filtering mediates the effects of realistic biodiversity losses on ecosystem functioning, *PNAS*, 118,  
639 10.1073/pnas.2022757118, 2021.

640 Yang, H., Wu, M., Liu, W., Zhang, Z. H. E., Zhang, N., and Wan, S.: Community structure and composition in  
641 response to climate change in a temperate steppe, *Glob Chang Biol*, 17, 452-465, 10.1111/j.1365-  
642 2486.2010.02253.x, 2011.

643 Ye, J. S., Delgado-Baquerizo, M., Soliveres, S., and Maestre, F. T.: Multifunctionality debt in global drylands  
644 linked to past biome and climate, *Glob Chang Biol*, 25, 2152-2161, 10.1111/gcb.14631, 2019.

645 Yin, Y., Liu, H., He, S., Zhao, F., Zhu, J., Wang, H., Liu, G., and Wu, X.: Patterns of local and regional grain  
646 size distribution and their application to Holocene climate reconstruction in semi-arid Inner Mongolia, China,  
647 *Palaeogeogr Palaeoclimatol Palaeoecol*, 307, 168–176, 10.1016/j.palaeo.2011.05.011, 2011.

648 Zanne, A. E., Tank, D. C., Cornwell, W. K., Eastman, J. M., Smith, S. A., FitzJohn, R. G., McGlenn, D. J.,  
649 O'Meara, B. C., Moles, A. T., Reich, P. B., Royer, D. L., Soltis, D. E., Stevens, P. F., Westoby, M., Wright, I. J.,  
650 Aarssen, L., Bertin, R. I., Calaminus, A., Govaerts, R., Hemmings, F., Leishman, M. R., Oleksyn, J., Soltis, P.  
651 S., Swenson, N. G., Warman, L., and Beaulieu, J. M.: Three keys to the radiation of angiosperms into freezing  
652 environments, *Nature*, 506, 89-92, 10.1038/nature12872, 2014.

653
